# Supplementary material for: High-yield, regiospecific bis-functionalization of C70 using a Diels–Alder reaction in molten anthracene
Source: Royal Society of Chemistry journal article supplement (doi:10.1039/c4cc02472a), 2014-01-01
Supplement: c4cc02472a1.pdf [file c4cc02472a1.pdf]

## **Topologically-controlled regiospecific *bis*-functionalization of C<sub>70</sub> using a Diels-Alder reaction**

Venkata S. Pavan K. Neti,<sup>a</sup> Maira R. Cerón,<sup>a</sup> A. Duarte-Ruiz,<sup>b\*</sup> Marilyn M. Olmstead,<sup>c\*</sup> Alan Balch<sup>c\*</sup> and Luis Echegoyen<sup>\*a</sup>

<sup>a</sup> Department of Chemistry, University of Texas at El Paso, El Paso, TX 79968, United States  
E-mail: echegoyen@utep.edu, Tel/Fax: +1 (915) 747-7573/(915) 747-8807

<sup>b</sup> Departamento de Química, Universidad Nacional de Colombia, Bogota, Colombia, E-mail:  
aduarter@unal.edu.co, Tel + 571-3 16 5000, Fax +571- 3 16 5220

<sup>c</sup> Department of Chemistry, University of California, Davis, One Shields Avenue, Davis, CA, 95616, United States. E-mail: mmolmstead@ucdavis.edu; albalch@ucdavis.edu; Fax +1 (530) 752 2820; Tel +1 (530) 752 0941

### **Contents**

#### **Section A. Synthetic Methods**

#### **Section B: <sup>1</sup>H & <sup>13</sup>C NMR spectra**

#### **Section C. UV-Vis spectral profiles**

#### **Section D. FT-IR spectral profiles**

#### **Section E. HPLC profile of crude and isolated compounds**

## Section A:

### Synthesis of 1 and 2:

A homogeneous mixture of  $C_{70}$  (0.1g, 0.11mmol) and anthracene (43 mg, 0.22mmol) were degassed and flame sealed in an ampule. The ampule was further heated at 240 °C for 2 hours and cooled down naturally. The ampule was broken and the solid was dissolved in  $CS_2$  and then purified by silica gel column chromatography. First fraction was un-reacted  $C_{70}$ , second and third fractions were **1** and **2**, as identified by spectroscopy.

### Section B. $^1H$ and $^{13}C$ NMR spectra of 1 and 2:

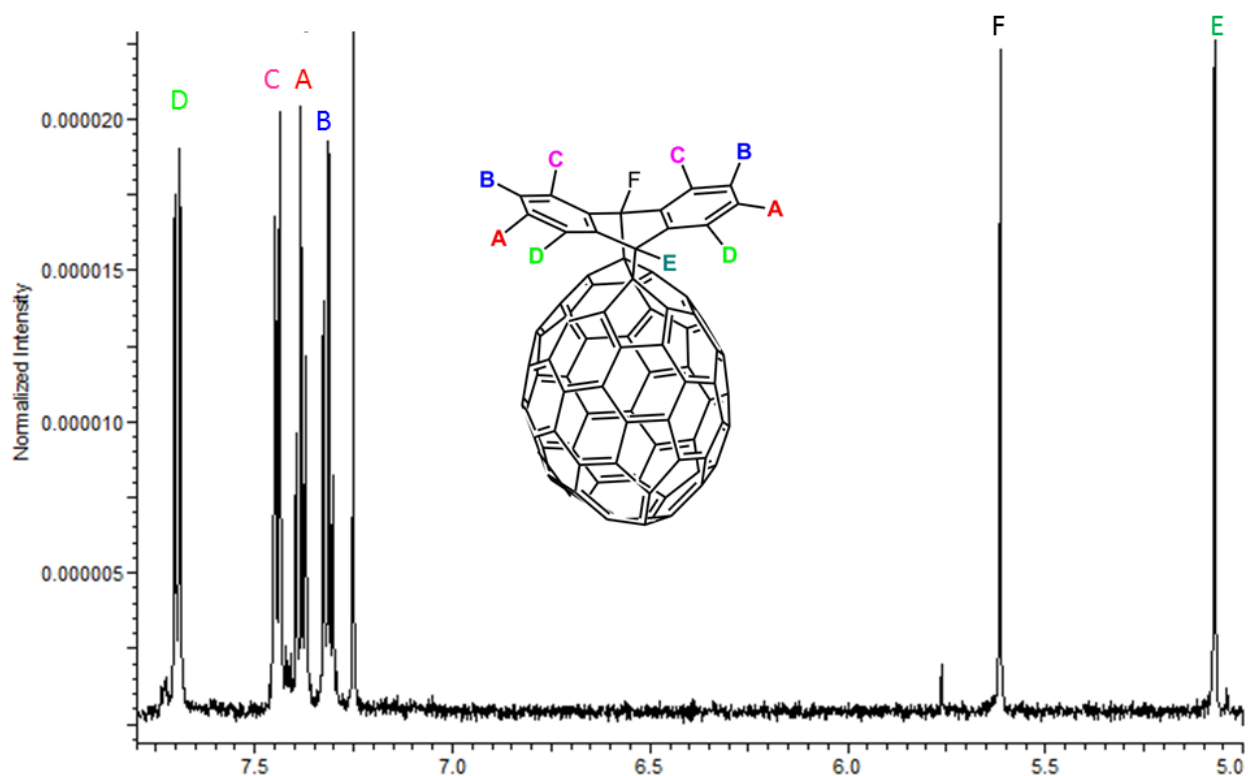

**Figure S1.**  $^1H$ -NMR spectrum of **1** (600 MHz, 298K,  $CS_2/CDCl_3$  (7:3)).  $H_e$  (s, 5.07),  $H_f$  (s, 5.62),  $H_d$  (d, 7.69-7.7,  $J = 6$ Hz),  $H_c$  (d, 7.44-7.45,  $J = 6$ Hz),  $H_a$  (t, 7.37-7.40,  $J = 18$ Hz) and  $H_b$  (t,  $J = 18$ Hz, 7.3-7.33ppm).

**$^{13}\text{C}$  NMR spectrum of 1:**

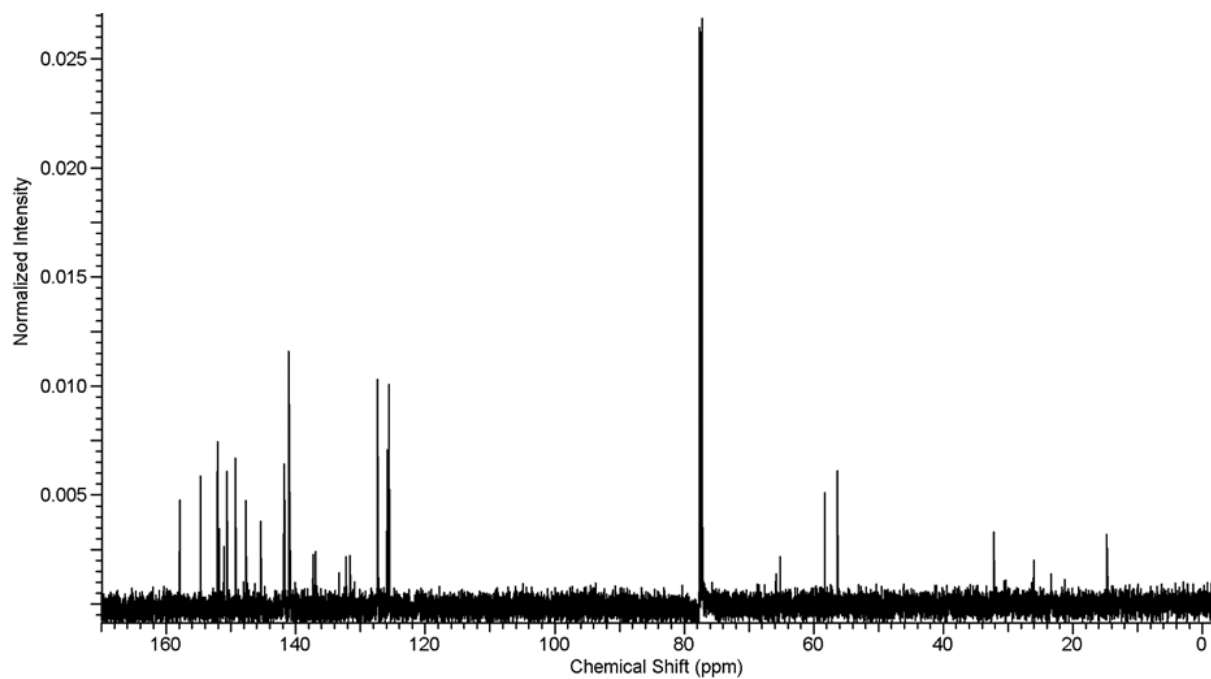

**Figure S2:**  $^{13}\text{C}$ -NMR spectrum of **1** (600 MHz, 298K,  $\text{CS}_2/\text{CDCl}_3$  (7:3)).  $\delta = 159.54, 155.93, 152.82, 152.47, 152.32, 152.09, 151.89, 151.63, 151.36, 151.12, 150.92, 150.48, 149.85, 148.62, 146.72, 142.96, 142.64, 141.13, 140.98, 138.68, 138.05, 137.77, 137.48, 136.95, 127.82, 127.41, 126.93, 126.54, 68.89, 65.26, 64.93, 57.87, \text{ and } 56.22\text{ppm}$ .

**<sup>1</sup>H-NMR spectrum of 2:**

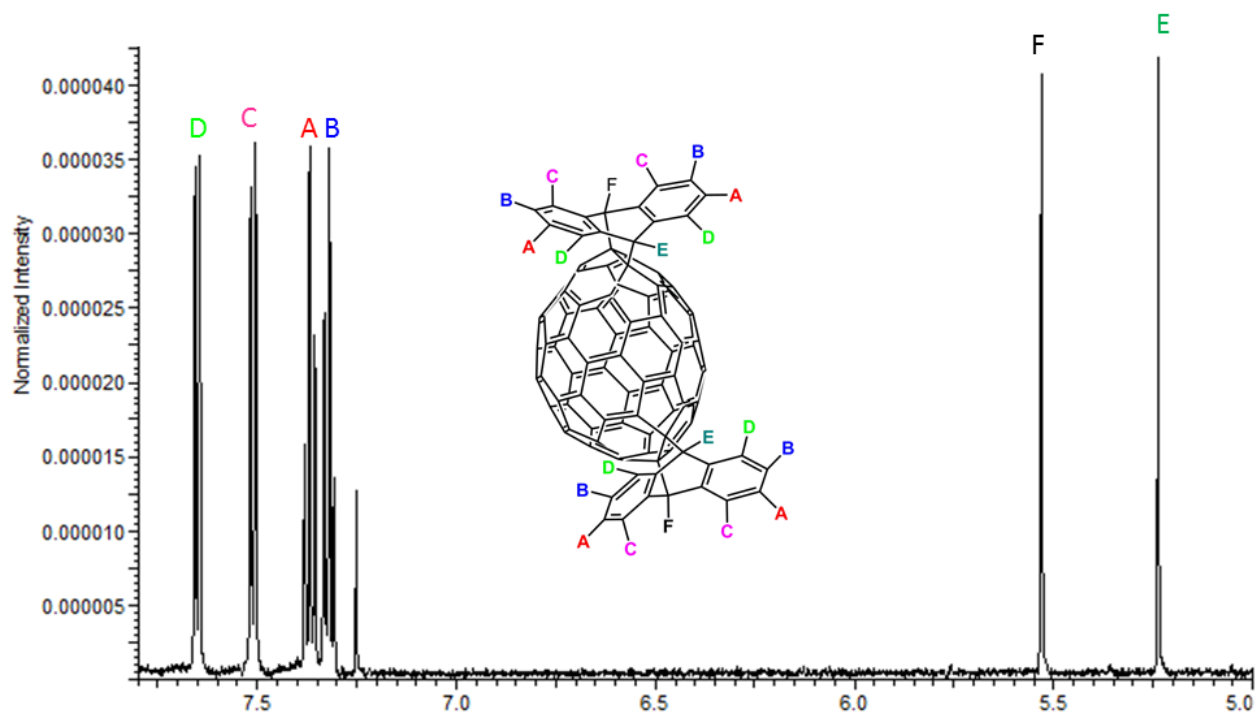

**Figure S3.** <sup>1</sup>H-NMR spectrum of **2** (600 MHz, 298K, CS<sub>2</sub>/CDCl<sub>3</sub> (7:3)). H<sub>e</sub> (s, 5.24), H<sub>f</sub> (s, 5.53), H<sub>d</sub> (d, 7.65-7.68, *J* = 18Hz), H<sub>c</sub> (d, 7.51-7.52, *J* = 6Hz), H<sub>a</sub> (t, 7.36-7.38, *J* = 12Hz) and H<sub>b</sub> (t, *J* = 12Hz, 7.31-7.33ppm).

**<sup>13</sup>C NMR spectrum of 2:**

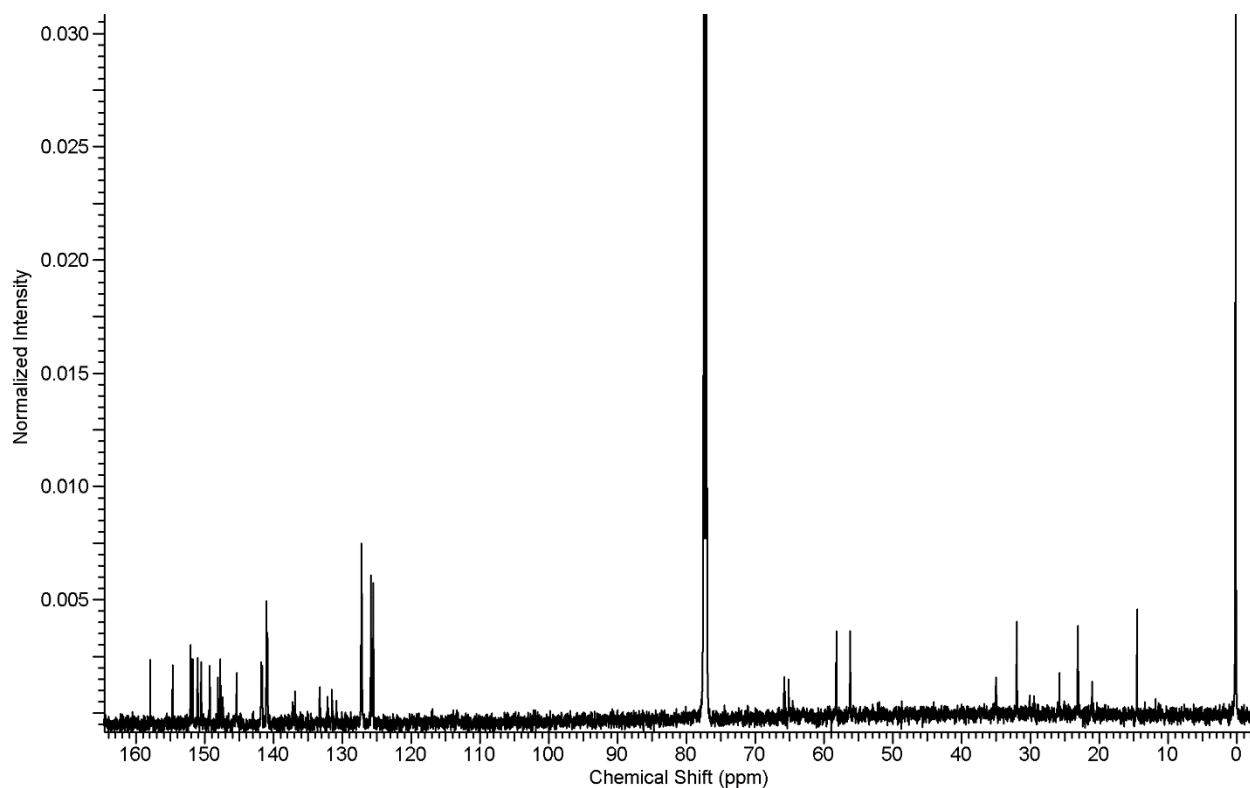

**Figure S4:** <sup>13</sup>C-NMR spectrum of **2** (600 MHz, 298K, CS<sub>2</sub>/CDCl<sub>3</sub>).  $\delta$  = 159.94, 159.23, 157.55, 156.88, 156.21, 155.72, 154.91, 153.7, 152.93, 151.36, 150.32, 149.45, 148.34, 147.62, 146.66, 145.86, 145.67, 144.80, 144.48, 143.31, 142.15, 141.18, 140.54, 139.50, 138.81, 137.33, 136.25, 135.77, 134.17, 133.21, 132.54, 131.29, 130.67, 130.12, 129.37, 128.92, 127.81, 127.25, 126.95, 125.66, 68.89, 67.34, 57.99, 57.88, and 55.11 ppm.

**Section C. UV-Vis spectral profiles**

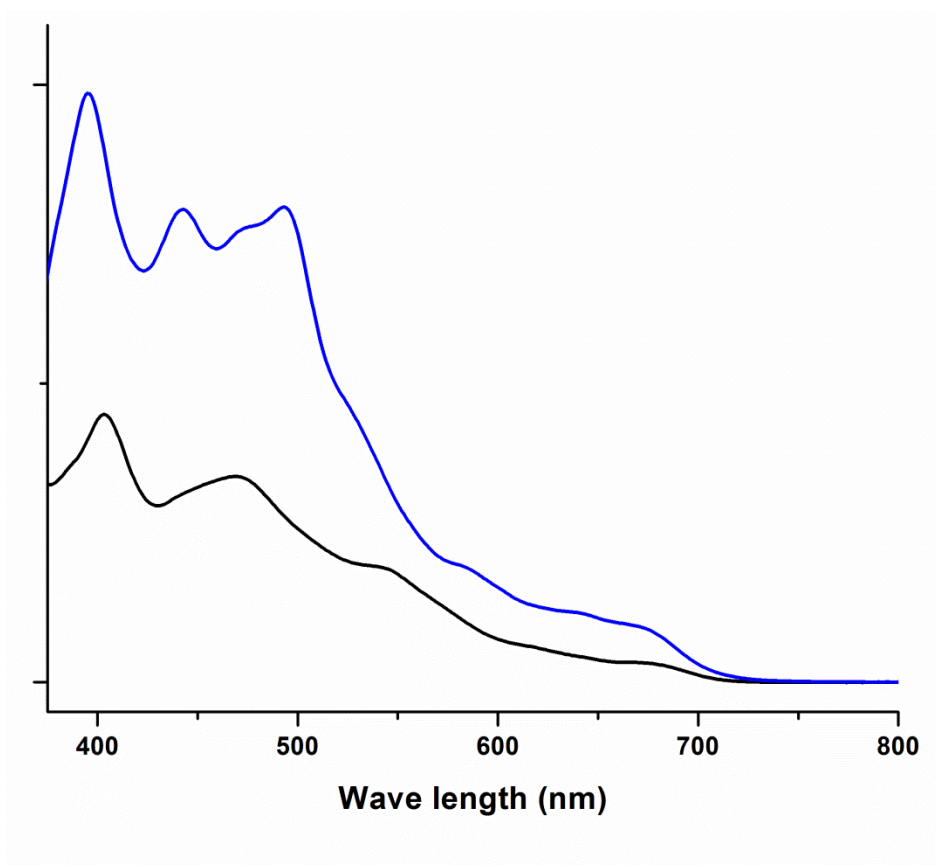

**Figure S5.** UV-Vis spectra of **1** (black) and **2** (blue) in CS<sub>2</sub>.

## Section D. FT-IR spectral profiles

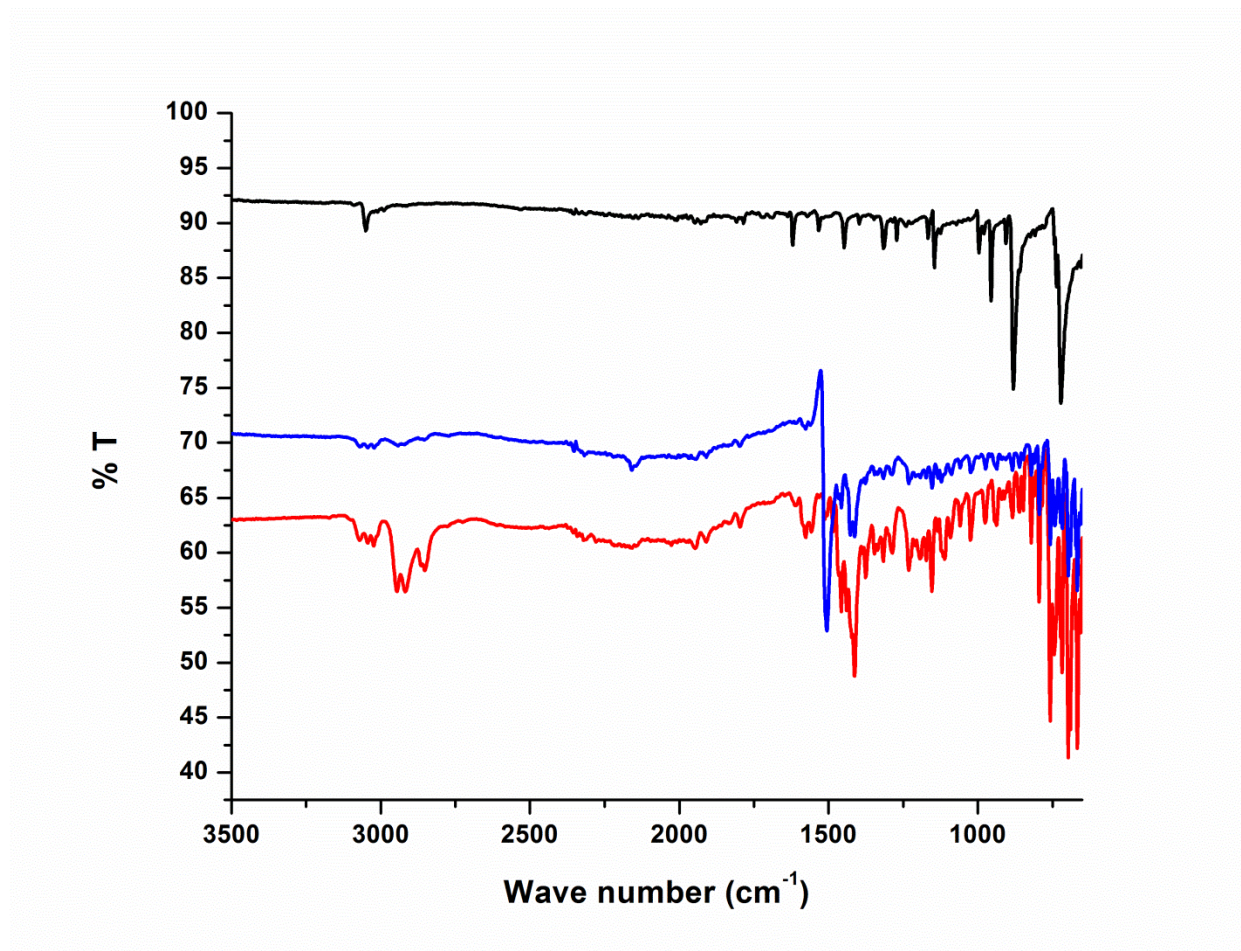

**Figure S6.** FT-IR spectra of spectra of C<sub>70</sub> (black), 1 (blue) and 2 (red).

## Section E. HPLC profile of crude and isolated compounds

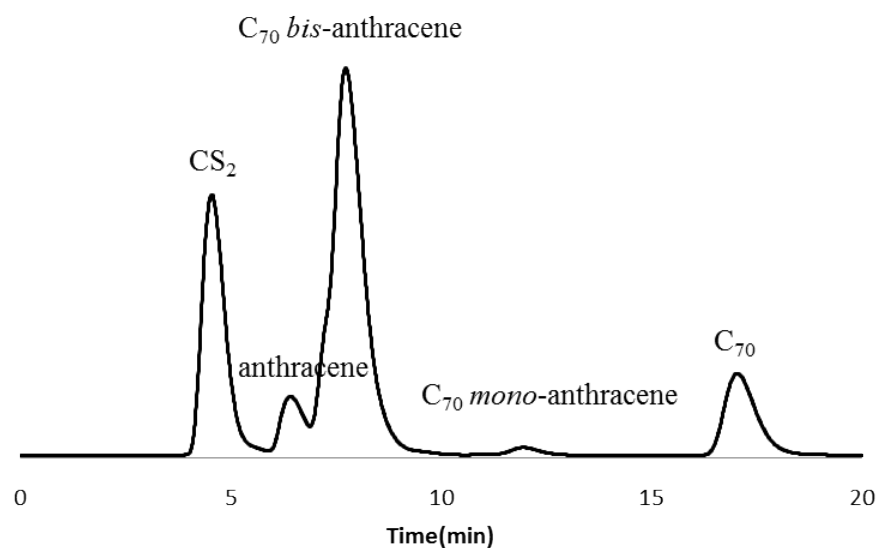

**Figure S7.** HPLC chromatogram of crude of the reaction between C<sub>70</sub> (10mg, 0.012mmol) and anthracene (4mg, 0.02mmol). Conditions: 5-PBB column ( $\varphi = 4.6\text{ID} \times 250\text{mm}$ ); toluene; flow rate: 1.2mL/min; wavelength: 320nm; room temperature.

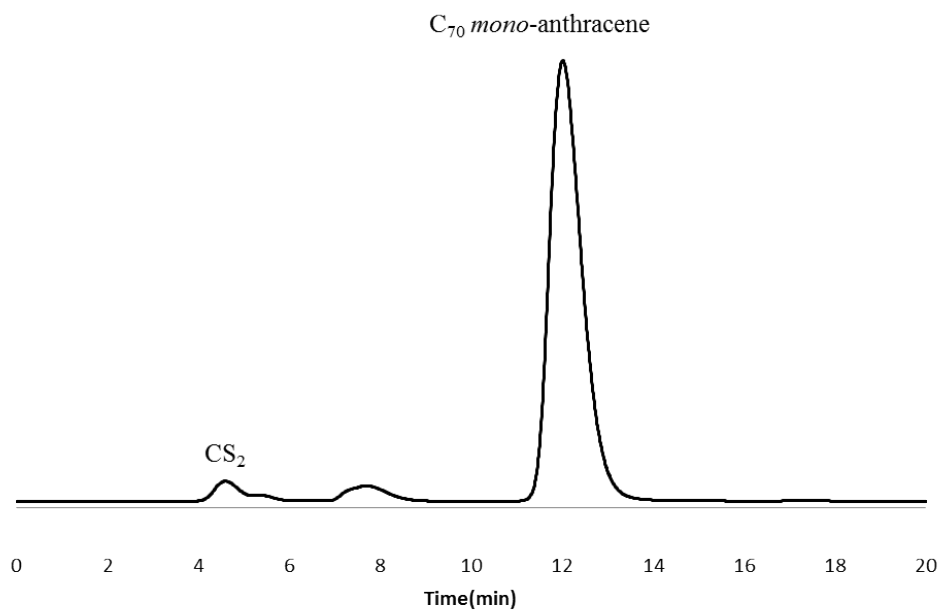

**Figure S8.** HPLC chromatogram of C<sub>70</sub> mono-anthracene. Conditions: 5-PBB column ( $\varphi = 4.6\text{ID} \times 250\text{mm}$ ); toluene; flow rate: 1.2mL/min; wavelength: 320nm; room temperature.



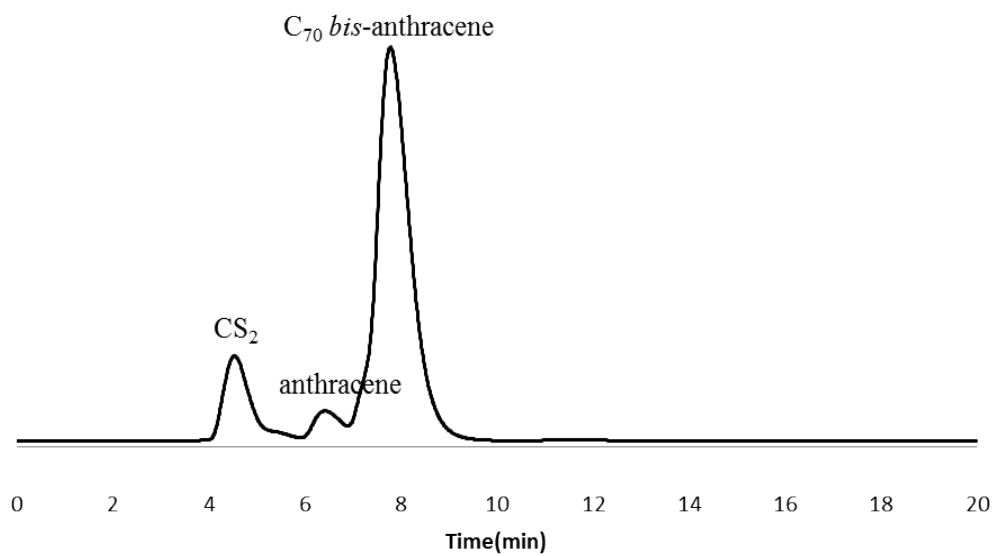

**Figure S9.** HPLC chromatogram of C<sub>70</sub> bis-anthracene. Conditions: 5-PBB column ( $\varphi = 4.6\text{ID} \times 250\text{mm}$ ); toluene; flow rate: 1.2mL/min; wavelength: 320nm; room temperature.
